# Supplementary material for: The Association between Caffeine Intake and the Colonic Mucosa-Associated Gut Microbiota in Humans—A Preliminary Investigation
Source: MDPI journal article supplement (doi:10.3390/nu15071747), 2023-04-03
Supplement: s1 [file s1]

**Supplemental Table S1.** Basic characteristics of study participants based on coffee consumption.

| <b>Characteristics</b><br><b>Mean ± standard deviation or n (%)</b> | <b>&lt; 2 cups</b><br><b>(n=17)</b> | <b>2 cups</b><br><b>(n=9)</b> | <b>≥ 3 cups</b><br><b>(n=8)</b> | <b>P value</b> |
|---------------------------------------------------------------------|-------------------------------------|-------------------------------|---------------------------------|----------------|
| Caffeine (mg)                                                       | 44.7 ± 33.6                         | 106.3 ± 41.0                  | 163.8 ± 71.4                    | < 0.0001       |
| Age (years)                                                         | 61.4 ± 5.16                         | 64.2 ± 4.38                   | 60.7 ± 7.35                     | 0.38           |
| Men, n (%)                                                          | 17 (100%)                           | 9 (100%)                      | 7 (87.5%)                       | 0.24           |
| Racial Group                                                        |                                     |                               |                                 | 0.18           |
| Non-Hispanic white, n (%)                                           | 12 (70.6%)                          | 9 (100%)                      | 7 (87.5%)                       |                |
| Body mass index (kg/m <sup>2</sup> )                                | 33.6 ± 6.32                         | 36.4 ± 7.23                   | 31.9 (5.54)                     | 0.34           |
| Smoking Status, n (%)                                               |                                     |                               |                                 | 0.83           |
| Never smokers                                                       | 8 (47.1%)                           | 2 (22.2%)                     | 3 (37.5%)                       |                |
| Former smokers                                                      | 6 (35.3%)                           | 5 (55.6%)                     | 3 (37.5%)                       |                |
| Current smokers                                                     | 3 (17.6%)                           | 2 (22.2%)                     | 2 (25.0%)                       |                |
| Alcohol Status, n (%)                                               |                                     |                               |                                 | 0.86           |
| Never drinkers                                                      | 4 (23.5%)                           | 2 (22.2%)                     | 3 (37.5%)                       |                |
| Former drinkers                                                     | 6 (35.3%)                           | 3 (33.3%)                     | 1 (12.5%)                       |                |
| Current Drinker                                                     | 7 (41.2%)                           | 4 (44.4%)                     | 4 (50.0%)                       |                |
| Hypertension, yes, n (%)                                            | 12 (70.6%)                          | 8 (88.9%)                     | 5 (62.5%)                       | 0.47           |
| Diabetes, yes, n (%)                                                | 8 (47.1%)                           | 5 (55.6%)                     | 4 (50.0%)                       | 1.00           |
| Daily total calorie intake (kcal)                                   | 1839 (±605)                         | 1632 (±644)                   | 2301 (±853)                     | 0.13           |
| Total carbohydrate (gram/1000kcal/day)                              | 115 (±23.2)                         | 112 (±18.3)                   | 112 (±19.0)                     | 0.89           |
| Total protein (gram/1000kcal/day)                                   | 36.1 (±5.99)                        | 40.5 (±8.43)                  | 40.0 (±8.21)                    | 0.25           |
| Total fat (gram/1000kcal/day)                                       | 41.5 (±8.29)                        | 42.5 (±6.86)                  | 43.4 (±5.07)                    | 0.82           |
| Vitamin B2 (mg/1000kcal/day)                                        | 0.89 (±0.21)                        | 1.20 (±0.22)                  | 1.34 (±0.37)                    | 0.0005         |
| Vitamin B6 (mg/1000kcal/day)                                        | 1.48 (±0.50)                        | 1.66 (± 0.71)                 | 2.22 (± 0.90)                   | 0.07           |
| Vitamin B12 (mcg/1000kcal/day)                                      | 2.19 ((±0.62)                       | 2.72 (± 1.07)                 | 2.82 (±0.93)                    | 0.15           |
| HEI score <sup>1</sup>                                              | 59.8 (±9.22)                        | 61.8 (±9.65)                  | 62.4 (±8.41)                    | 0.76           |

<sup>1</sup>HEI, healthy eating index.

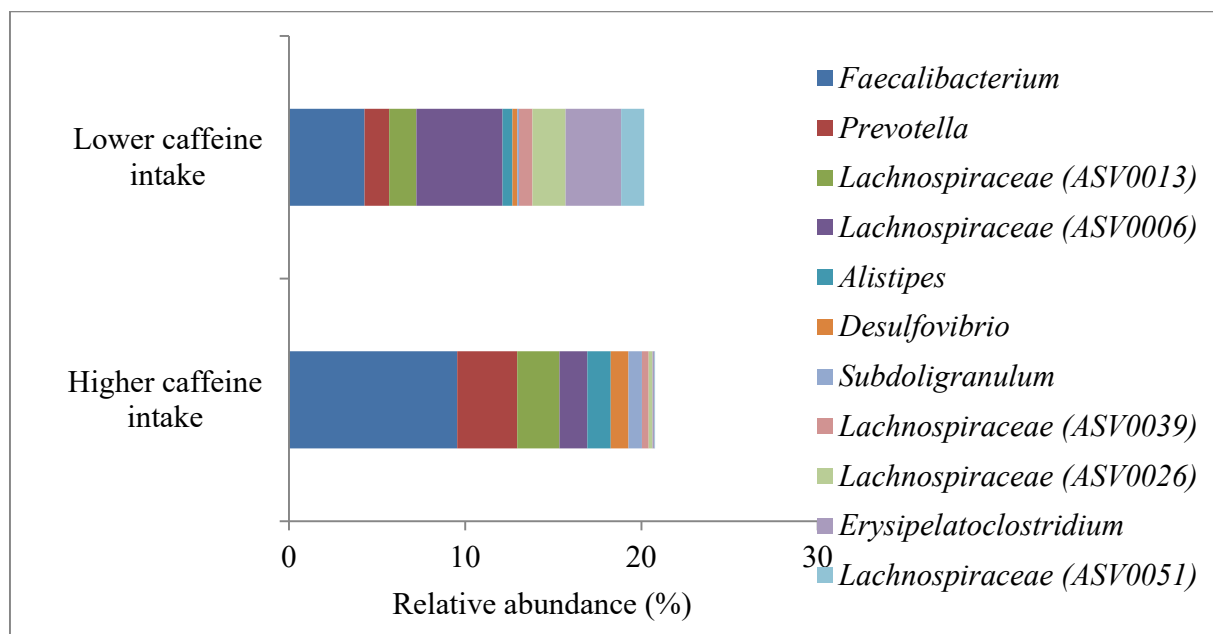

**Supplemental Figure S1.** The relative abundance of bacterial genus by lower vs. higher intake of caffeine ( $q$  value < 0.05).
